# Supplementary material
Source: publisher figshare collection journal article supplement (https://acs.figshare.com/ndownloader/files/4753438)
Supplement: Supplementary file 1 [file 4753438]

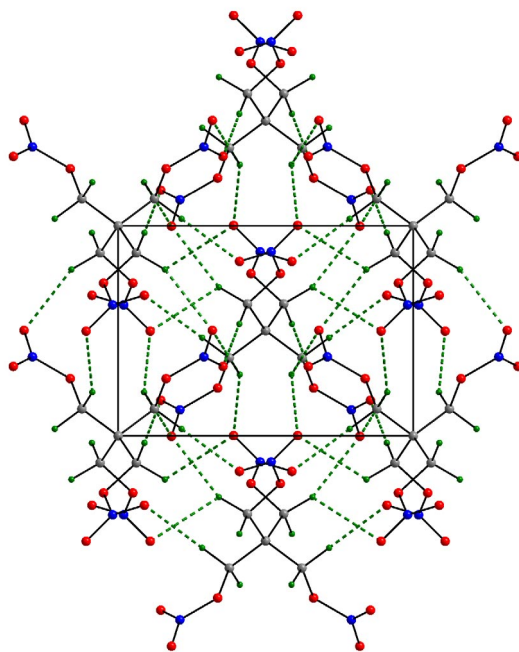

PETN packing diagram showing hydrogen bonds as green dashed lines – projection down the a-axis.

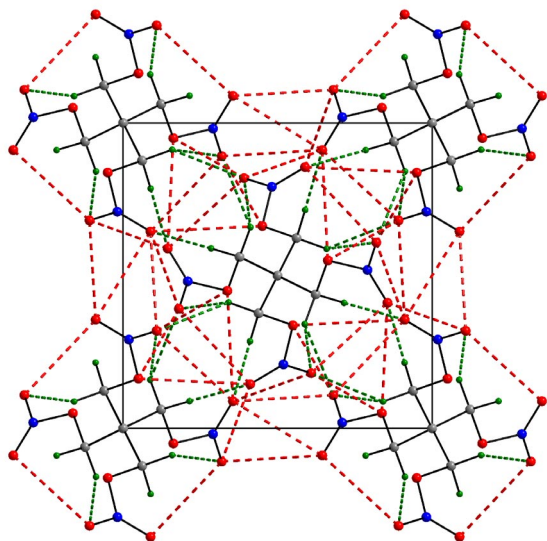

(a)

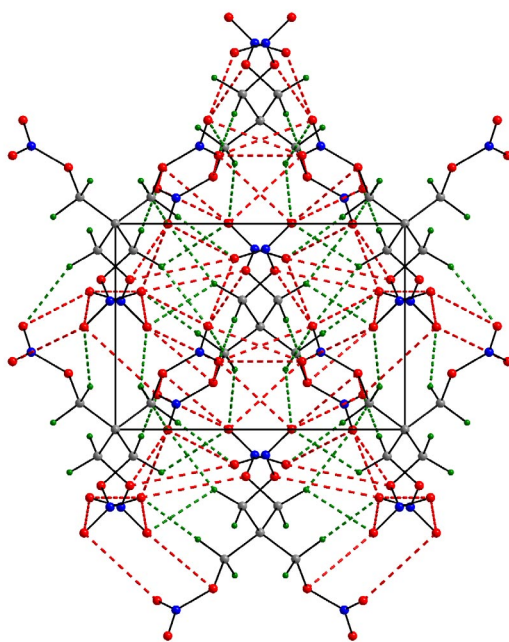

(b)

PETN packing diagram showing hydrogen bonds as green dashed lines and O...O interactions as red dashed lines: a) – projection down the c-axis, b) – projection down the a-axis. Every bond was confirmed to have the associated (3,-1) critical point in the electron density, bond and virial paths.
